# Supplementary material for: Modified Sol–Gel Synthesis of Mesoporous Borate Bioactive Glasses for Potential Use in Wound Healing
Source: MDPI journal article supplement (doi:10.3390/bioengineering9090442), 2022-09-05
Supplement: s1 [file s1]

**Table S1:** The calculated kinetic of B-ions releasing during 168 h of incubations.

| <b>B</b>                             |            |          |          |          |          |
|--------------------------------------|------------|----------|----------|----------|----------|
| <b>Time</b>                          | Ag 0       | Ag 1     | Ag 2.5   | Ag 5     | Ag 7.5   |
| <b>0-24</b>                          | 2.33333333 | 2.833333 | 3        | 3.333333 | 3.75     |
| <b>24-72</b>                         | 3.20833333 | 3.708333 | 2.458333 | 2.8125   | 3.041667 |
| <b>72-168</b>                        | -1.25      | -0.58333 | -1.04167 | -1.09375 | -1.15625 |
| <b>Average</b>                       | 1.43055556 | 1.986111 | 1.472222 | 1.684028 | 1.878472 |
| <b>Increase compared to MBG-Ag 0</b> | -          | 38.83495 | 2.912621 | 17.71845 | 31.31068 |

**Table S2:** The calculated kinetic of P-ions releasing during 168 h of incubations.

| <b>P</b>                             |             |          |          |          |          |
|--------------------------------------|-------------|----------|----------|----------|----------|
| <b>Time</b>                          | Ag 0        | Ag 1     | Ag 2.5   | Ag 5     | Ag 7.5   |
| <b>0-24</b>                          | -0.20833333 | -0.41667 | -0.29167 | -0.20833 | -0.25    |
| <b>24-72</b>                         | -0.10416667 | -0.125   | -0.10417 | -0.08333 | -0.08333 |
| <b>72-168</b>                        | -0.125      | -0.10417 | -0.125   | -0.14583 | -0.09375 |
| <b>Average</b>                       | -0.14583333 | -0.21528 | -0.17361 | -0.14583 | -0.14236 |
| <b>Increase compared to MBG-Ag 0</b> | -           | 47.61908 | 19.04765 | 0        | -2.38093 |

**Table S3:** The calculated kinetic of Ca-ions releasing during 168 h of incubations.

| <b>Ca</b>                            |            |          |          |          |          |
|--------------------------------------|------------|----------|----------|----------|----------|
| <b>Time</b>                          | Ag 0       | Ag 1     | Ag 2.5   | Ag 5     | Ag 7.5   |
| <b>0-24</b>                          | 1.04166667 | 1.416667 | 0.875    | 0.791667 | 0.666667 |
| <b>24-72</b>                         | 0.20833333 | 0.145833 | 0.145833 | 0.083333 | 0.166667 |
| <b>72-168</b>                        | 0.1875     | 0.125    | 0.083333 | 0.114583 | 0.052083 |
| <b>Average</b>                       | 0.47916667 | 0.5625   | 0.368056 | 0.329861 | 0.295139 |
| <b>Increase compared to MBG-Ag 0</b> | -          | 17.3913  | -23.1884 | -31.1594 | -38.4058 |

**Table S4:** The calculated kinetic of Na-ions releasing during 168 h of incubations.

| <b>Na</b>                            |            |          |          |          |          |
|--------------------------------------|------------|----------|----------|----------|----------|
| <b>Time</b>                          | Ag 0       | Ag 1     | Ag 2.5   | Ag 5     | Ag 7.5   |
| <b>0-24</b>                          | 0.41666667 | 0.666667 | 0.916667 | 1        | 0.875    |
| <b>24-72</b>                         | 0.04166667 | 0.125    | 0.041667 | 0.125    | 0.125    |
| <b>72-168</b>                        | 0.04166667 | 0.020833 | 0.03125  | 0.0625   | 0.145833 |
| <b>Average</b>                       | 0.16666667 | 0.270833 | 0.329861 | 0.395833 | 0.381944 |
| <b>Increase compared to MBG-Ag 0</b> | -          | 62.5     | 97.91666 | 137.5    | 129.1667 |

**Table S5:** The calculated kinetic of Mg-ions releasing during 168 h of incubations.

| <b>Mg</b>                            |            |          |          |          |          |
|--------------------------------------|------------|----------|----------|----------|----------|
| <b>Time</b>                          | Ag 0       | Ag 1     | Ag 2.5   | Ag 5     | Ag 7.5   |
| <b>0-24</b>                          | 0.33333333 | 0.5      | 0.958333 | 1.041667 | 1        |
| <b>24-72</b>                         | 0.125      | 0.166667 | 0.083333 | 0.166667 | 0.270833 |
| <b>72-168</b>                        | 0.13541667 | 0.135417 | 0.135417 | 0.125    | 0.114583 |
| <b>Average</b>                       | 0.19791667 | 0.267361 | 0.392361 | 0.444444 | 0.461806 |
| <b>Increase compared to MBG-Ag 0</b> | -          | 35.08772 | 98.24561 | 124.5614 | 133.3333 |

**Table S6:** The calculated kinetic of K-ions releasing during 168 h of incubations.

| <b>K</b>                             |            |          |          |          |          |
|--------------------------------------|------------|----------|----------|----------|----------|
| <b>Time</b>                          | Ag 0       | Ag 1     | Ag 2.5   | Ag 5     | Ag 7.5   |
| <b>0-24</b>                          | 0.33333333 | 0.625    | 0.75     | 0.958333 | 1.125    |
| <b>24-72</b>                         | 0.16666667 | 0.125    | 0.166667 | 0.229167 | 0.291667 |
| <b>72-168</b>                        | 0.13541667 | 0.15625  | 0.21875  | 0.364583 | 0.395833 |
| <b>Average</b>                       | 0.21180556 | 0.302083 | 0.378472 | 0.517361 | 0.604167 |
| <b>Increase compared to MBG-Ag 0</b> | -          | 42.62295 | 78.68852 | 144.2623 | 185.2459 |

**Table S7:** The calculated kinetic of Ag-ions releasing during 168 h of incubations.

| <b>Ag</b>                            |      |          |          |          |          |
|--------------------------------------|------|----------|----------|----------|----------|
| <b>Time</b>                          | Ag 0 | Ag 1     | Ag 2.5   | Ag 5     | Ag 7.5   |
| <b>0-24</b>                          | -    | 0.083333 | 0.25     | 0.5      | 0.791667 |
| <b>24-72</b>                         | -    | 0.041667 | 0.0625   | 0.125    | 0.0625   |
| <b>72-168</b>                        | -    | 0.052083 | 0.09375  | 0.114583 | 0.125    |
| <b>Average</b>                       | -    | 0.059028 | 0.135417 | 0.246528 | 0.326389 |
| <b>Increase compared to MBG-Ag 1</b> | -    | -        | 129.4109 | 317.6455 | 452.9391 |

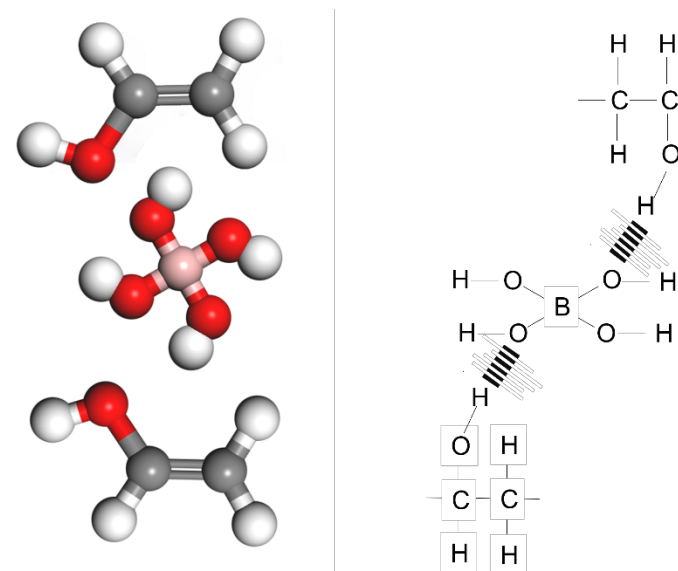

**Figure S1:** The structure of poly vinyl borate which forms during the synthesis process.

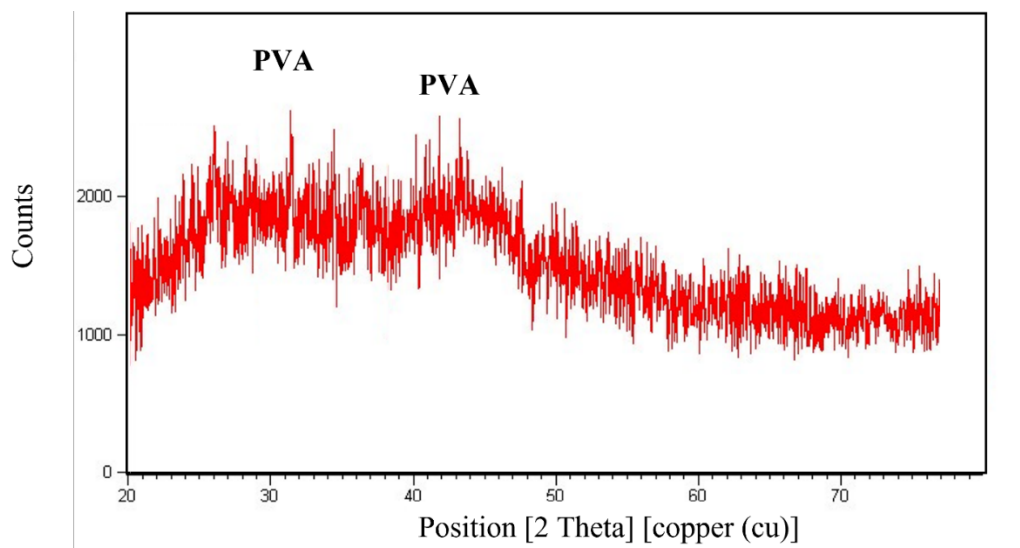

**Figure S2:** The XRD pattern of the formed gels after this in-situ deposition of compounds.
